# Supplementary material for: The Relationship Between Asian Dust Events and Out-of-Hospital Cardiac Arrests in Japan
Source: PubMed Central journal article supplement (PMC4375283; doi:10.2188/jea.je20140179), 2015-04-05
Supplement: je-25-289-s001.pdf [file je-25-289-s001.pdf]

eTable. Odds ratios and 95% confidence intervals of total sudden cardiac arrests (excluding external cause) for dust exposure (binary), as assessed by LIDAR measurements during spring season (men and women)

|                                       | Climatically adjusted odds ratios (95% CI) (model 1) |                     |                     |                     |                     | Odds ratios (95% CI), further adjusted by air pollution (model 2) |                     |                     |                     |                      |
|---------------------------------------|------------------------------------------------------|---------------------|---------------------|---------------------|---------------------|-------------------------------------------------------------------|---------------------|---------------------|---------------------|----------------------|
|                                       | Lag day 0                                            | Lag day 1           | Lag day 2           | Lag day 3           | Lag days 0-3        | Lag day 0                                                         | Lag day 1           | Lag day 2           | Lag day 3           | Lag days 0-3         |
| <b>Total excluding external cause</b> |                                                      |                     |                     |                     |                     |                                                                   |                     |                     |                     |                      |
| Hokkaido                              | 0.957 (0.723-1.265)                                  | 1.081 (0.821-1.423) | 0.882 (0.649-1.199) | 1.080 (0.814-1.434) | 1.059 (0.891-1.259) | 0.972 (0.730-1.293)                                               | 1.085 (0.818-1.438) | 0.895 (0.657-1.219) | 1.065 (0.801-1.416) | 1.027 (0.845-1.249)  |
| Miyagi                                | 1.164 (0.659-2.058)                                  | 1.658 (0.868-3.166) | 1.034 (0.562-1.903) | 1.248 (0.731-2.131) | 1.569 (0.744-3.311) | 0.913 (0.460-1.811)                                               | 1.542 (0.694-3.427) | 0.670 (0.318-1.412) | 1.292 (0.742-2.250) | 2.579 (0.546-12.189) |
| Ibaraki                               | 0.858 (0.602-1.221)                                  | 1.125 (0.777-1.629) | 1.178 (0.818-1.695) | 0.990 (0.703-1.394) | 1.055 (0.809-1.376) | 0.890 (0.619-1.280)                                               | 1.126 (0.767-1.652) | 1.122 (0.763-1.651) | 1.019 (0.714-1.454) | 0.955 (0.709-1.285)  |
| Niigata                               | 0.748 (0.366-1.528)                                  | 0.710 (0.322-1.566) | 0.577 (0.268-1.240) | 0.743 (0.386-1.430) | 0.734 (0.527-1.021) | 0.738 (0.352-1.545)                                               | 0.757 (0.319-1.797) | 0.597 (0.270-1.320) | 0.735 (0.372-1.453) | 0.710 (0.484-1.040)  |
| Toyama                                | 0.615 (0.396-0.954)                                  | 1.023 (0.700-1.496) | 0.925 (0.639-1.340) | 0.988 (0.675-1.446) | 0.792 (0.574-1.094) | 0.673 (0.423-1.072)                                               | 1.328 (0.857-2.060) | 1.065 (0.717-1.581) | 0.986 (0.672-1.446) | 0.634 (0.401-1.002)  |
| Shimane                               | 1.004 (0.819-1.23)                                   | 0.899 (0.726-1.114) | 1.068 (0.869-1.312) | 1.176 (0.962-1.437) | 1.069 (0.928-1.231) | 1.113 (0.894-1.384)                                               | 0.937 (0.740-1.186) | 1.104 (0.891-1.369) | 1.168 (0.952-1.432) | 1.123 (0.965-1.307)  |
| Nagasaki                              | 0.930 (0.72-1.201)                                   | 0.847 (0.644-1.114) | 0.847 (0.648-1.106) | 1.073 (0.832-1.384) | 0.908 (0.795-1.036) | 0.918 (0.701-1.202)                                               | 0.798 (0.594-1.071) | 0.844 (0.635-1.123) | 1.109 (0.856-1.436) | 0.908 (0.778-1.059)  |
| Pooled analysis                       | 0.926 (0.822-1.043)                                  | 0.973 (0.861-1.100) | 0.967 (0.856-1.092) | 1.084 (0.965-1.218) | 0.972 (0.872-1.084) | 0.957 (0.844-1.086)                                               | 1.000 (0.870-1.149) | 0.976 (0.859-1.110) | 1.092 (0.970-1.229) | 0.946 (0.822-1.089)  |

CI, confidence interval.
